# Supplementary material
Source: publisher figshare collection journal article supplement (https://acs.figshare.com/ndownloader/files/13155845)
Supplement: Supplementary file 1 [file 13155845]

## Supporting Information

### Non-covalent Pyrene-PEG Coatings of Carbon Nanotubes Achieve *In Vitro* Biocompatibility

*Mehdi Meran<sup>a</sup>, Pelin Deniz Akkus<sup>a</sup>, Ozge Kurkcuoglu<sup>a</sup>, Elif Baysak<sup>b</sup>, Gurkan Hizal<sup>b</sup>, Ebru Haciosmanoglu<sup>c</sup>, Ayhan Unlu<sup>d</sup>, Nilgun Karatepe<sup>e</sup>, F. Seniha Güner<sup>a</sup>*

<sup>a</sup>Department of Chemical Engineering, Istanbul Technical University, Istanbul, Turkey

<sup>b</sup>Department of Chemistry, Istanbul Technical University, Istanbul, Turkey

<sup>c</sup>Department of Physiology, Faculty of Medicine, Istanbul Bilim University, Istanbul, Turkey

<sup>d</sup>Department of Biophysics, Faculty of Medicine, Trakya University, Edirne, Turkey

<sup>e</sup>Energy Institute, Renewable Energy Division, Istanbul Technical University, Istanbul, Turkey

#### Corresponding Authors

Prof. Dr. F. Seniha Guner

Tel: +90 212 285 68 36

guners@itu.edu.tr

Asst. Prof. Dr. Ozge Kurkcuoglu

Tel: +90 212 285 35 23

olevitas@itu.edu.tr

## Table of contents

### Molecular Dynamics Results

- **Figure S1.** Dynamics of PEG chains on SWNTs and coating of the SWNT by four PEG<sub>2000</sub> chains in different conformations (from M<sub>4</sub>)
- **Figure S2.** (a)  $\pi$ - $\pi$  interactions between SWNTs (yellow) from neighboring box in simulation (a) M<sub>2</sub> and (b) M<sub>3</sub>. (c) SWNTs from neighboring simulation boxes do not interact in simulation M<sub>6</sub>. Water molecules are not shown for clarity.

### SWNT Synthesis

- **Figure S3.** Raman spectra of SWNTs synthesized at 800 °C

### Thermogravimetric analysis of SWNTs coated with Pyr-PEG<sub>5000</sub>

- **Figure S4.** Thermogravimetric results of PEG<sub>5000</sub>, short SWNT and short SWNT coated with Pyr-PEG<sub>5000</sub>

### Cell Viability Results

- **Figure S5.** Cell viability percentages for the fabricated short and long SWNT. Double asterisk ( $\square\square$ ) denotes a statistically significant difference between fabricated short and long SWNT treatment groups according to one-way ANNOVA ( $p \leq 0.01$ ).
- **Figure S6.** Cell viability percentages for the fabricated short and long SWNT. The asterisk ( $\square$ ) denotes a statistically significant difference between long SWNT and short SWNT coated with Pyr-PEG<sub>2000</sub> treatment groups according to Student's t-test ( $p \leq 0.05$ ).
- **Figure S7.** Cell viability percentages for the fabricated short and long SWNT. The asterisk ( $\square$ ) denotes a statistically significant difference between long SWNT and

short SWNT coated with Pyr-PEG<sub>5000</sub> treatment groups according to Student's t-test ( $p \leq 0.05$ ).

## Molecular Dynamics Results

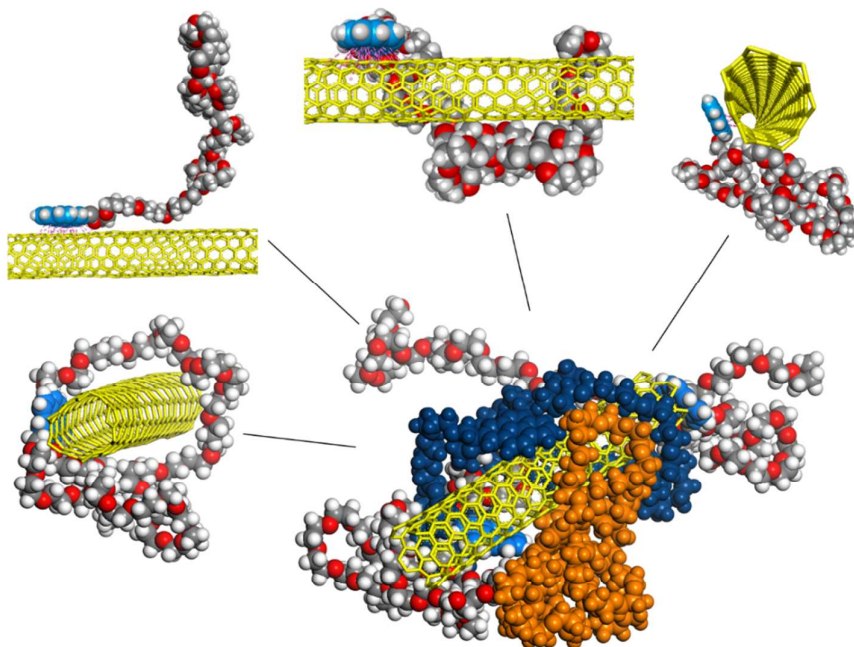

**Figure S1.** Dynamics of PEG chains on SWNTs and coating of the SWNT by four PEG<sub>2000</sub> chains in different conformations (from M<sub>4</sub>)

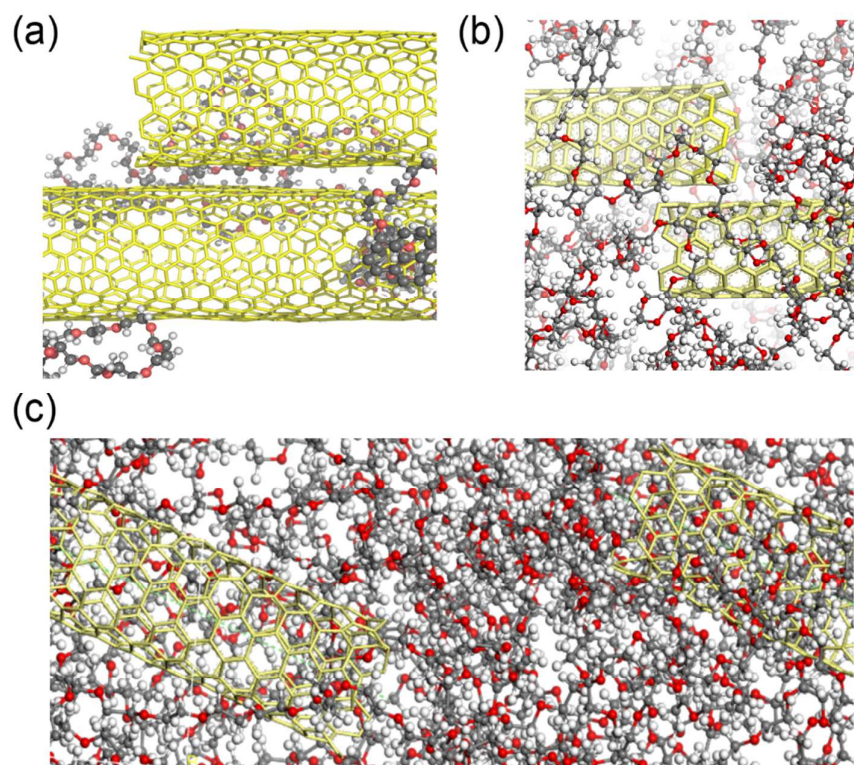

**Figure S2.** (a)  $\pi$ - $\pi$  interactions between SWNTs (yellow) from neighboring box in simulation

(a) M<sub>2</sub> and (b) M<sub>3</sub>. (c) SWNTs from neighboring simulation boxes do not interact in simulation M<sub>6</sub>. Water molecules are not shown for clarity.

## SWNT Synthesis

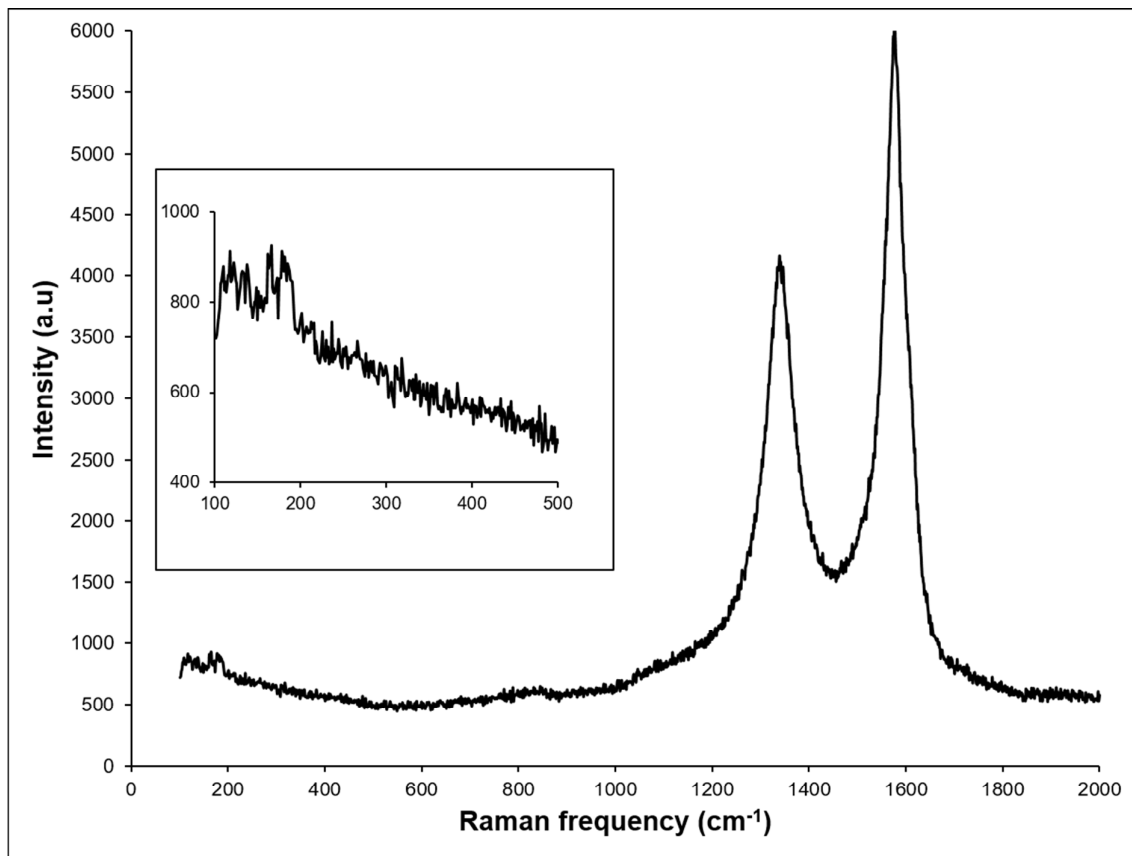

**Figure S3.** Raman spectra of SWNTs synthesized at 800 °C

### Thermogravimetric analysis of SWNTs coated with Pyr-PEG<sub>5000</sub>

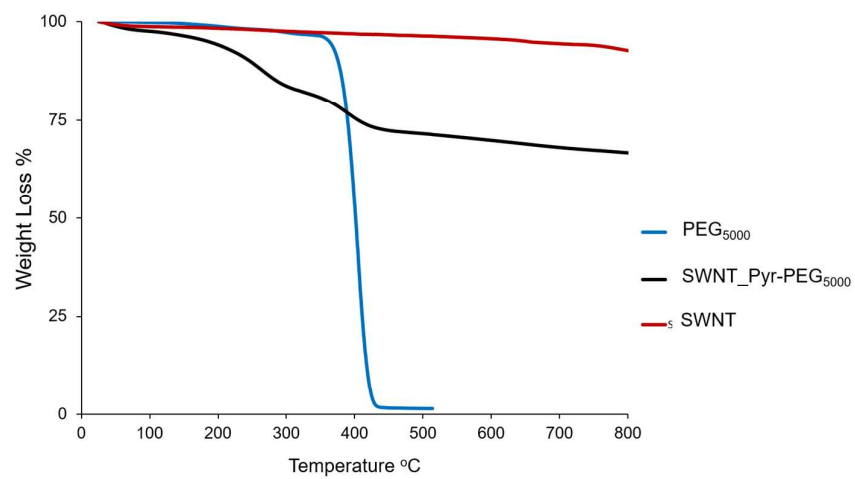

**Figure S4.** Thermogravimetric results of PEG<sub>5000</sub>, short SWNT and short SWNT coated with Pyr-PEG<sub>5000</sub>

## Cell Viability Results

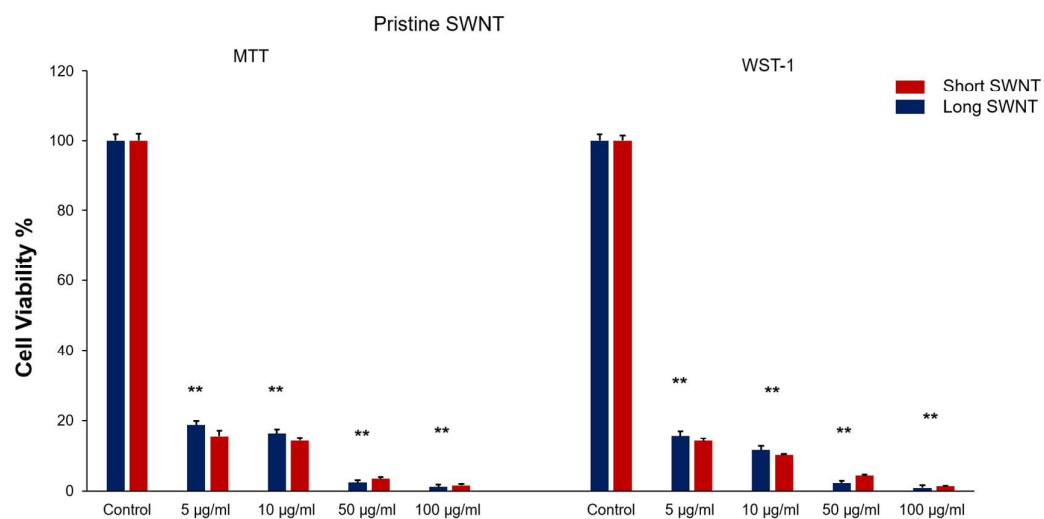

**Figure S5.** Cell viability percentages for the fabricated short and long SWNT. Double asterisk (\*\*) denotes a statistically significant difference between fabricated short and long SWNT treatment groups according to one-way ANNOVA ( $p \leq 0.01$ ).



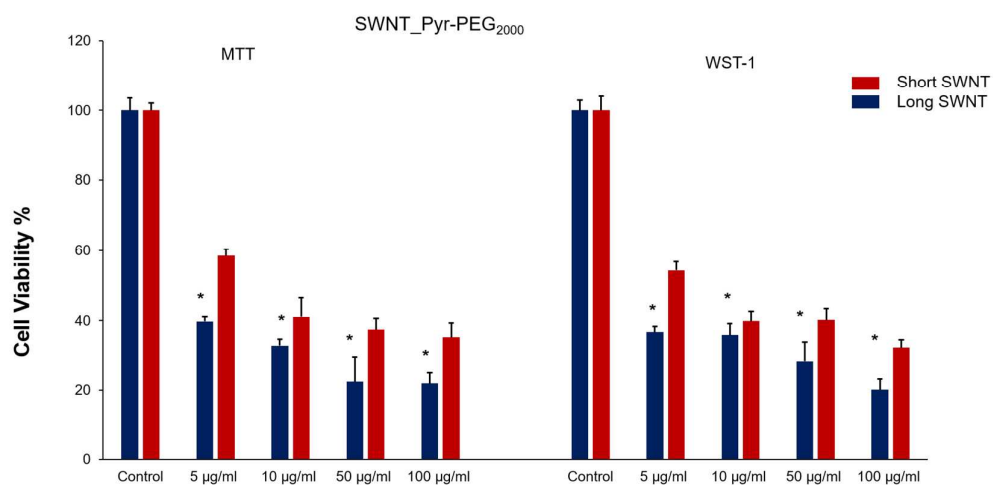

**Figure S6.** Cell viability percentages for the fabricated short and long SWNT. The asterisk (\*) denotes a statistically significant difference between long SWNT and short SWNT coated with Pyr-PEG<sub>2000</sub> treatment groups according to Student's t-test ( $p \leq 0.05$ ).

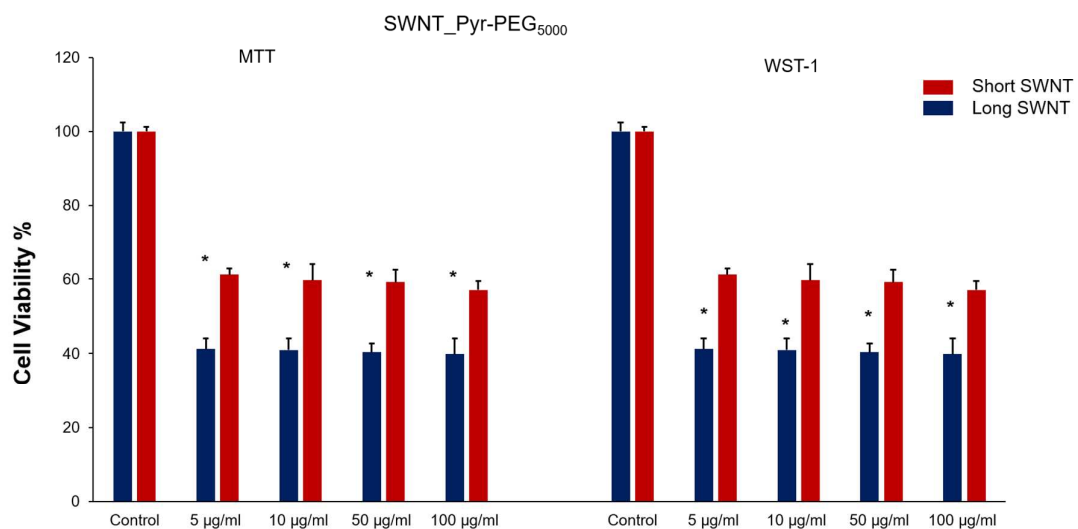

**Figure S7.** Cell viability percentages for the fabricated short and long SWNT. The asterisk (\*) denotes a statistically significant difference between long SWNT and short SWNT coated with Pyr-PEG<sub>5000</sub> treatment groups according to Student's t-test ( $p \leq 0.05$ ).
